# Supplementary material for: Controllable synthesis of carbon encapsulated iron phosphide nanoparticles for the chemoselective hydrogenation of aromatic nitroarenes to anilines
Source: Royal Society of Chemistry journal article supplement (doi:10.1039/c7qi00803a), 2018-01-01
Supplement: c7qi00803a1.pdf [file c7qi00803a1.pdf]

## Electronic Supplementary Information

### Controllable synthesis of carbon encapsulated iron phosphide nanoparticles for chemoselective hydrogenation of aromatic nitroarenes to anilines

Yanan Zhu,<sup>a, b</sup> Shuliang Yang,<sup>a</sup> Changyan Cao,<sup>\*a, b</sup> Weiguo Song,<sup>\*a, b</sup> and Li-Jun Wan<sup>a</sup>

<sup>a</sup>Beijing National Laboratory for Molecular Sciences, Laboratory of Molecular Nanostructures and Nanotechnology, CAS Research/Education Center for Excellence in Molecular Sciences, Institute of Chemistry, Chinese Academy of Sciences, Beijing, 100190, P.R. China.

<sup>b</sup>University of Chinese Academy of Sciences, Beijing, 100049, P.R. China.

E-mail: [cycas@iccas.ac.cn](mailto:cycas@iccas.ac.cn), [wsong@iccas.ac.cn](mailto:wsong@iccas.ac.cn).

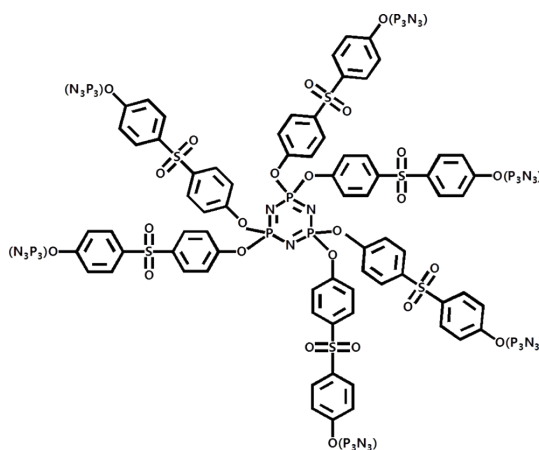

**Fig. S1** Molecular structure of PZS

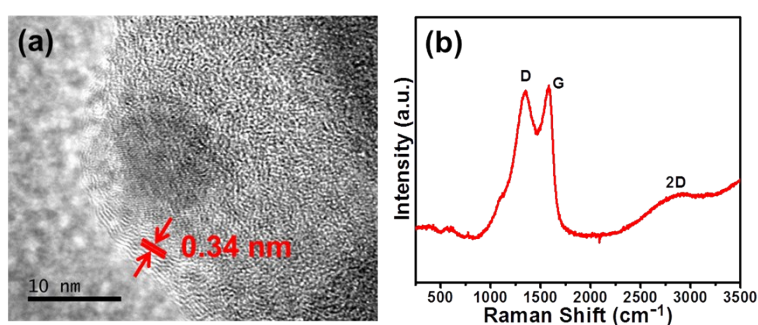

**Fig. S2** (a) HRTEM image and (b) Raman spectra of Fe<sub>2</sub>P@C

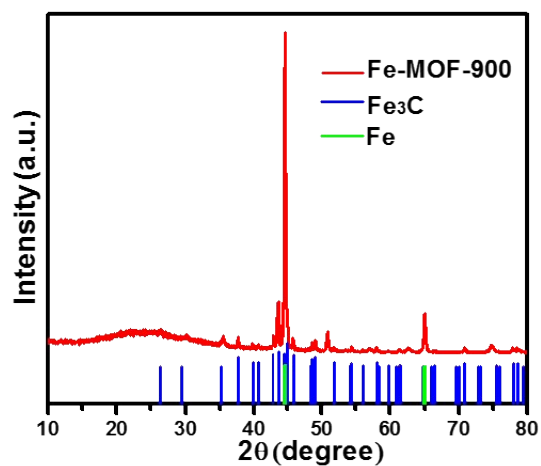

Fig. S3 XRD pattern of Fe-MOF-900.

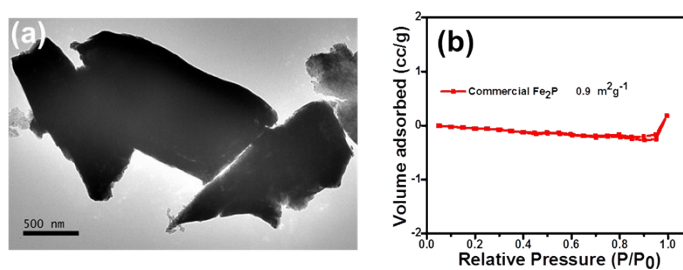

Fig. S4 TEM image and N<sub>2</sub> adsorption-desorption isotherm of commercial Fe<sub>2</sub>P.

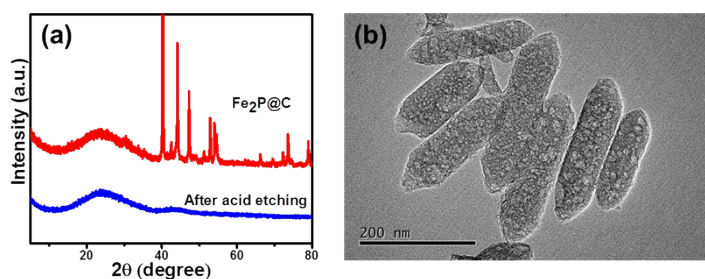

Fig. S5 XRD pattern (a) and TEM image (b) of Fe<sub>2</sub>P@C after etching with aqua regia for two days.

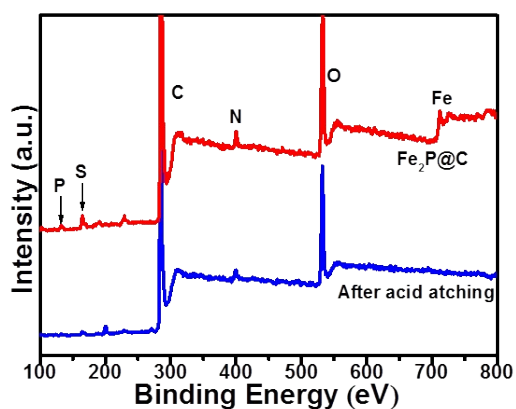

Fig. S6 XPS full spectrum of Fe<sub>2</sub>P@C and after etching with aqua regia for two days.

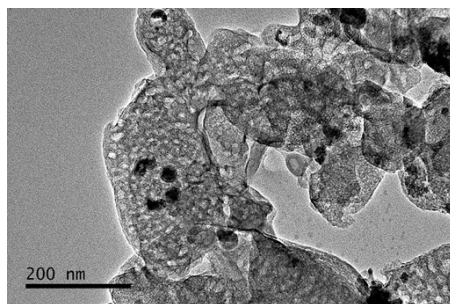

**Fig. S7** TEM image of Fe<sub>2</sub>P@C after reused for five times

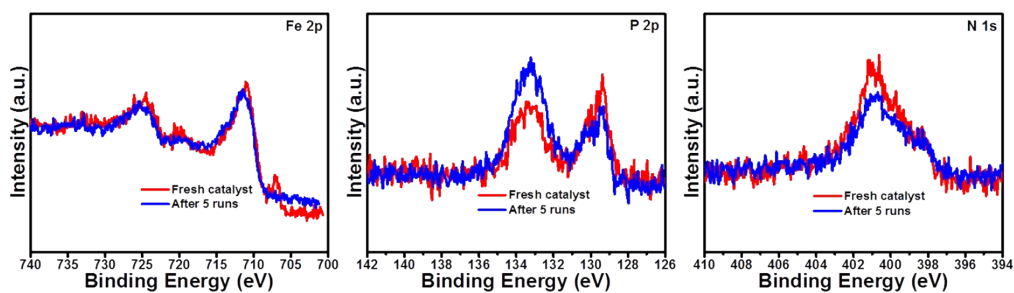

**Fig. S8** XPS spectra of (a) Fe 2p, (b) P 2p and (c) N 1s of fresh catalyst (red lines) and after 5 runs (blue lines).

**Table S1.** The bond energy of the substituent groups

| Bond energy (KJ/mol)                                                                |             | Bond energy (KJ/mol)                                                                |             |
|-------------------------------------------------------------------------------------|-------------|-------------------------------------------------------------------------------------|-------------|
|  | 391.5 ± 8   |  | 420.9 ± 4.2 |
|  | 309.4 ± 3.5 |  | 416.7 ± 5.9 |
|  | 399.6 ± 6.3 |  | 463.6 ± 4.2 |
|  | 463.6 ± 4.2 | C=O                                                                                 | 728         |
| C=C                                                                                 | 611         |                                                                                     |             |
